# Supplementary material
Source: PubMed Central journal article supplement (PMC2728694)
Supplement: jn.109.107458_1.pdf [file jn.109.107458_1.pdf]

Supplemental Table 1. Number of compounds and chemical classes identified in common fruits and vegetables<sup>1</sup>.

| CHEMICAL CLASSES                  | GRAPE                     | BLUEBERRY                     | APPLE                     | ARTICHOKE              | AVOCADO                 | BANANA                   | BROCCOLI                 | CARROT               | ONION              | ORANGE                     | POMEGRANATE            | SPINACH                  | STRAWBERRY                   | TOMATO                           |
|-----------------------------------|---------------------------|-------------------------------|---------------------------|------------------------|-------------------------|--------------------------|--------------------------|----------------------|--------------------|----------------------------|------------------------|--------------------------|------------------------------|----------------------------------|
|                                   | <i>Vitis</i> <sup>2</sup> | <i>Vaccinium</i> <sup>3</sup> | <i>Malus</i> <sup>4</sup> | <i>Cynara scolymus</i> | <i>Persea americana</i> | <i>Musa</i> <sup>5</sup> | <i>Brassica oleracea</i> | <i>Daucus carota</i> | <i>Allium cepa</i> | <i>Citrus</i> <sup>6</sup> | <i>Punica granatum</i> | <i>Spinacia oleracea</i> | <i>Fragaria</i> <sup>7</sup> | <i>Lycopersicon</i> <sup>8</sup> |
|                                   | 1,620 compounds           | 722 compounds                 | 473 compounds             | 272 compounds          | 427 compounds           | 401 compounds            | 658 compounds            | 892 compounds        | 825 compounds      | 1,442 compounds            | 261 compounds          | 271 compounds            | 367 compounds                | 621 compounds                    |
| Alicyclic                         | ✓                         | ✓                             | ✓                         | ✓                      | ✓                       |                          | ✓                        | ✓                    | ✓                  | ✓                          | ✓                      | ✓                        | ✓                            | ✓                                |
| Alkaloid                          | ✓                         |                               | ✓                         | ✓                      | ✓                       | ✓                        | ✓                        | ✓                    | ✓                  | ✓                          | ✓                      | ✓                        | ✓                            | ✓                                |
| Alkanal C5 or more                |                           |                               |                           |                        |                         |                          |                          |                      |                    |                            |                        |                          |                              |                                  |
| Alkane                            | ✓                         | ✓                             | ✓                         | ✓                      | ✓                       | ✓                        | ✓                        | ✓                    | ✓                  | ✓                          | ✓                      | ✓                        | ✓                            | ✓                                |
| Alkanol                           | ✓                         | ✓                             | ✓                         | ✓                      | ✓                       | ✓                        | ✓                        | ✓                    | ✓                  | ✓                          | ✓                      | ✓                        | ✓                            | ✓                                |
| Alkanone                          | ✓                         | ✓                             | ✓                         |                        |                         | ✓                        | ✓                        | ✓                    | ✓                  | ✓                          |                        |                          | ✓                            | ✓                                |
| Alkenal C5 or more                | ✓                         | ✓                             |                           | ✓                      |                         |                          | ✓                        | ✓                    | ✓                  | ✓                          |                        |                          | ✓                            |                                  |
| Alkene                            |                           | ✓                             | ✓                         | ✓                      | ✓                       |                          | ✓                        | ✓                    | ✓                  | ✓                          | ✓                      |                          | ✓                            | ✓                                |
| Alkenol C5 or more                |                           | ✓                             | ✓                         | ✓                      | ✓                       | ✓                        | ✓                        | ✓                    | ✓                  | ✓                          |                        |                          | ✓                            | ✓                                |
| Alkenone C5 or more               |                           |                               | ✓                         | ✓                      | ✓                       |                          | ✓                        |                      | ✓                  | ✓                          |                        |                          |                              | ✓                                |
| Alkenyne C5 or more               |                           |                               |                           | ✓                      |                         |                          |                          |                      |                    |                            |                        |                          |                              |                                  |
| Alkenynol C5 or more              |                           |                               |                           |                        |                         |                          |                          |                      |                    |                            |                        |                          |                              | ✓                                |
| Alkynol C5 or more                |                           |                               |                           |                        | ✓                       |                          |                          | ✓                    |                    |                            |                        |                          |                              |                                  |
| Anthocyanidin                     |                           |                               | ✓                         |                        |                         |                          |                          |                      |                    |                            |                        |                          |                              |                                  |
| Anthocyanin                       |                           |                               |                           | ✓                      |                         |                          | ✓                        | ✓                    |                    |                            | ✓                      |                          |                              |                                  |
| Anthraquinone                     | ✓                         |                               |                           |                        |                         |                          |                          |                      |                    |                            |                        |                          |                              |                                  |
| Benzenoid                         | ✓                         | ✓                             | ✓                         | ✓                      | ✓                       | ✓                        | ✓                        | ✓                    | ✓                  | ✓                          | ✓                      | ✓                        | ✓                            | ✓                                |
| Betaxanthin                       |                           |                               |                           |                        |                         |                          |                          |                      |                    |                            |                        | ✓                        |                              |                                  |
| Bibenzyl                          | ✓                         |                               |                           |                        |                         |                          |                          |                      |                    |                            |                        |                          |                              |                                  |
| Carotene                          | ✓                         |                               |                           |                        |                         |                          |                          |                      |                    |                            |                        | ✓                        |                              |                                  |
| Carotenoid                        | ✓                         | ✓                             | ✓                         | ✓                      | ✓                       |                          | ✓                        | ✓                    | ✓                  | ✓                          |                        | ✓                        | ✓                            | ✓                                |
| Carbohydrate                      | ✓                         | ✓                             | ✓                         | ✓                      | ✓                       | ✓                        | ✓                        | ✓                    | ✓                  | ✓                          | ✓                      | ✓                        | ✓                            | ✓                                |
| Catechol                          |                           |                               | ✓                         |                        |                         |                          |                          |                      |                    |                            |                        |                          |                              |                                  |
| Chromone                          |                           |                               |                           |                        |                         |                          |                          | ✓                    |                    |                            |                        |                          |                              |                                  |
| Coumarin                          | ✓                         | ✓                             | ✓                         | ✓                      | ✓                       |                          | ✓                        | ✓                    | ✓                  | ✓                          | ✓                      | ✓                        | ✓                            | ✓                                |
| Diterpene                         |                           |                               | ✓                         |                        | ✓                       |                          |                          |                      | ✓                  | ✓                          |                        | ✓                        |                              | ✓                                |
| Flavone                           | ✓                         |                               | ✓                         | ✓                      | ✓                       |                          | ✓                        | ✓                    | ✓                  | ✓                          | ✓                      | ✓                        | ✓                            | ✓                                |
| Flavonol                          | ✓                         | ✓                             | ✓                         | ✓                      | ✓                       | ✓                        | ✓                        | ✓                    | ✓                  | ✓                          | ✓                      | ✓                        | ✓                            | ✓                                |
| Flavonoid                         | ✓                         | ✓                             | ✓                         | ✓                      | ✓                       | ✓                        | ✓                        | ✓                    | ✓                  | ✓                          | ✓                      | ✓                        | ✓                            | ✓                                |
| Flavanone                         |                           |                               | ✓                         | ✓                      |                         |                          |                          |                      |                    | ✓                          | ✓                      | ✓                        | ✓                            | ✓                                |
| Indole alkaloid                   | ✓                         |                               | ✓                         |                        | ✓                       | ✓                        | ✓                        | ✓                    | ✓                  |                            |                        | ✓                        | ✓                            | ✓                                |
| Indolizidine alkaloid             |                           |                               |                           |                        |                         |                          |                          |                      |                    |                            |                        |                          |                              |                                  |
| Inorganic substance               | ✓                         | ✓                             | ✓                         |                        | ✓                       | ✓                        | ✓                        | ✓                    |                    | ✓                          |                        | ✓                        | ✓                            | ✓                                |
| Iridoid monoterpene               |                           | ✓                             |                           |                        |                         |                          |                          |                      |                    |                            |                        |                          |                              |                                  |
| Isoflavone                        |                           |                               |                           |                        |                         |                          |                          |                      |                    |                            | ✓                      |                          |                              |                                  |
| Isoquinoline alkaloid             | ✓                         |                               |                           |                        | ✓                       | ✓                        | ✓                        | ✓                    |                    | ✓                          |                        | ✓                        |                              |                                  |
| Leucoanthocyanin                  |                           |                               |                           |                        |                         |                          |                          |                      |                    |                            |                        |                          | ✓                            |                                  |
| Lignan                            | ✓                         |                               | ✓                         |                        |                         |                          |                          | ✓                    |                    |                            |                        |                          |                              |                                  |
| Lipid                             | ✓                         | ✓                             | ✓                         |                        | ✓                       | ✓                        | ✓                        | ✓                    | ✓                  | ✓                          | ✓                      | ✓                        | ✓                            | ✓                                |
| Misc. lactone                     |                           | ✓                             | ✓                         |                        | ✓                       | ✓                        |                          |                      |                    | ✓                          | ✓                      |                          | ✓                            |                                  |
| Monoterpene                       | ✓                         | ✓                             | ✓                         | ✓                      | ✓                       |                          |                          | ✓                    | ✓                  | ✓                          |                        |                          | ✓                            | ✓                                |
| Non-alkaloid nitrogen heterocycle |                           |                               |                           |                        |                         |                          | ✓                        | ✓                    |                    |                            |                        | ✓                        | ✓                            | ✓                                |
| Oxazolidine                       |                           |                               |                           |                        |                         |                          | ✓                        |                      |                    |                            |                        |                          |                              |                                  |
| Oxygen heterocycle                | ✓                         | ✓                             | ✓                         | ✓                      | ✓                       | ✓                        | ✓                        | ✓                    | ✓                  |                            |                        | ✓                        | ✓                            | ✓                                |
| Phenolic glycoside                |                           | ✓                             |                           |                        |                         |                          |                          |                      |                    |                            |                        |                          |                              |                                  |
| Phenol                            | ✓                         |                               |                           |                        |                         |                          |                          |                      |                    |                            |                        |                          |                              |                                  |
| Phenylpropanoid                   | ✓                         | ✓                             | ✓                         | ✓                      | ✓                       | ✓                        | ✓                        | ✓                    | ✓                  | ✓                          | ✓                      | ✓                        | ✓                            | ✓                                |
| Pheophorbide derivative           |                           |                               |                           |                        |                         |                          | ✓                        |                      |                    |                            |                        | ✓                        |                              |                                  |
| Polycyclic                        |                           |                               | ✓                         |                        |                         | ✓                        |                          |                      |                    |                            |                        |                          |                              |                                  |
| Proteid                           | ✓                         | ✓                             | ✓                         | ✓                      | ✓                       | ✓                        | ✓                        | ✓                    | ✓                  | ✓                          |                        | ✓                        | ✓                            | ✓                                |
| Quinoid                           | ✓                         | ✓                             |                           |                        |                         | ✓                        |                          | ✓                    |                    | ✓                          |                        | ✓                        |                              | ✓                                |
| Quinolizidine alkaloid            |                           | ✓                             |                           |                        |                         |                          |                          |                      | ✓                  | ✓                          |                        |                          |                              |                                  |
| Sapogenin                         |                           |                               |                           |                        |                         |                          |                          | ✓                    | ✓                  |                            |                        |                          |                              | ✓                                |
| Saponin                           |                           |                               |                           |                        |                         |                          |                          | ✓                    | ✓                  | ✓                          | ✓                      | ✓                        | ✓                            | ✓                                |
| Sesquiterpene                     | ✓                         | ✓                             | ✓                         | ✓                      | ✓                       | ✓                        | ✓                        | ✓                    | ✓                  | ✓                          | ✓                      | ✓                        | ✓                            | ✓                                |
| Steroid                           | ✓                         | ✓                             | ✓                         | ✓                      | ✓                       | ✓                        | ✓                        | ✓                    | ✓                  | ✓                          | ✓                      | ✓                        | ✓                            | ✓                                |
| Steroid alkaloid                  |                           |                               |                           |                        |                         |                          |                          |                      |                    |                            |                        |                          |                              | ✓                                |
| Steroidal saponin                 |                           |                               |                           |                        |                         |                          |                          |                      |                    |                            |                        |                          |                              |                                  |
| Sterols and/or triterpene         |                           |                               |                           |                        |                         |                          | ✓                        | ✓                    |                    | ✓                          | ✓                      |                          |                              |                                  |
| Stilbene                          | ✓                         | ✓                             | ✓                         |                        |                         |                          |                          | ✓                    |                    | ✓                          |                        |                          |                              |                                  |
| Sulfur compound                   |                           |                               |                           |                        |                         |                          | ✓                        |                      | ✓                  |                            |                        |                          | ✓                            |                                  |
| Tannin                            | ✓                         | ✓                             |                           |                        |                         |                          |                          | ✓                    |                    |                            | ✓                      |                          | ✓                            |                                  |
| Triterpene                        | ✓                         | ✓                             | ✓                         | ✓                      |                         | ✓                        | ✓                        | ✓                    | ✓                  | ✓                          |                        | ✓                        | ✓                            | ✓                                |
| Tropane alkaloid                  |                           |                               |                           |                        |                         |                          |                          |                      |                    |                            | ✓                      |                          |                              |                                  |
| Vitamin                           |                           | ✓                             | ✓                         |                        | ✓                       | ✓                        | ✓                        | ✓                    | ✓                  | ✓                          |                        | ✓                        | ✓                            | ✓                                |

1. Derived from a search of the NAPRALERT<sup>SM</sup> database (14)2. *Vitis vinifera*; *V. saccharifera*3. *Vaccinium angustifolium*; *V. australe*; *V. corymbosum*; *V. Myrtillus*4. *Malus domestica*; *M. Sylvestris*5. *Musa acuminata*; *M. paradisiaca*; *M. sapientum*; *M. Species*6. *Citrus aurantiifolia*; *C. aurantium*; *C. sinensis*7. *Fragaria ananassa*; *F. species*; *F. vesca*8. *Lycopersicon esculentum*; *L. pimpinellifolium*
